# Supplementary material
Source: PubMed Central journal article supplement (PMC4561690)

**Table S1.** Soil characteristics of the experimental field, average values of minimal ( $T_{\min}$ ) and maximal ( $T_{\max}$ ) temperature, and rainfall during the sampling period of Odisseo and Saragolla durum wheat.

| <b>Soil characteristics</b>         |                                                                     |                                             |                                     |                        |                                                 |                                               |                                                        |                                                      |                                                              |                                                            |
|-------------------------------------|---------------------------------------------------------------------|---------------------------------------------|-------------------------------------|------------------------|-------------------------------------------------|-----------------------------------------------|--------------------------------------------------------|------------------------------------------------------|--------------------------------------------------------------|------------------------------------------------------------|
| Soil texture                        | Slimy-loam (36% sand, 40% silt and 24% clay)                        |                                             |                                     |                        |                                                 |                                               |                                                        |                                                      |                                                              |                                                            |
| Preceding crop                      | Barley                                                              |                                             |                                     |                        |                                                 |                                               |                                                        |                                                      |                                                              |                                                            |
| Soil nutrient supply before seeding | Total nitrogen 0.9%, nitrates 4.37 ppm                              |                                             |                                     |                        |                                                 |                                               |                                                        |                                                      |                                                              |                                                            |
| Weeding                             | On March 13 <sup>th</sup> , 2014, with tribenuron and tifensulfuron |                                             |                                     |                        |                                                 |                                               |                                                        |                                                      |                                                              |                                                            |
| Fungicidal treatment                | On May, 5 <sup>th</sup> , 2014, with trifloxystrobin                |                                             |                                     |                        |                                                 |                                               |                                                        |                                                      |                                                              |                                                            |
| <b>Climatic trend during crop</b>   |                                                                     |                                             |                                     |                        |                                                 |                                               |                                                        |                                                      |                                                              |                                                            |
| Enviromental conditions             | April                                                               |                                             |                                     | May                    |                                                 |                                               | June                                                   |                                                      |                                                              | July                                                       |
|                                     | 1 <sup>st</sup> decade<br>(Tillering)                               | 2 <sup>nd</sup> decade<br>(Stem elongation) | 3 <sup>rd</sup> decade<br>(Booting) | 1 <sup>st</sup> decade | 2 <sup>nd</sup> decade<br>(Saragolla flowering) | 3 <sup>rd</sup> decade<br>(Odisseo flowering) | 1 <sup>st</sup> decade<br>(Saragolla milk development) | 2 <sup>nd</sup> decade<br>(Odisseo milk development) | 3 <sup>rd</sup> decade<br>(Saragolla physiological maturity) | 1 <sup>st</sup> decade<br>(Odisseo physiological maturity) |
| $T_{\min}$ (°C)                     | 7.4                                                                 | 5.8                                         | 8.9                                 | 10.5                   | 9.7                                             | 11.3                                          | 12.6                                                   | 16.5                                                 | 16.2                                                         | 16.9                                                       |
| $T_{\max}$ (°C)                     | 17.5                                                                | 15.5                                        | 18.4                                | 22.5                   | 21.3                                            | 22.9                                          | 25.5                                                   | 28.5                                                 | 28.8                                                         | 29.6                                                       |
| Rainfall (mm)                       | 25.2                                                                | 51.9                                        | 26.2                                | 42.7                   | 13.0                                            | 26.6                                          | 28.5                                                   | 114.8                                                | 0.4                                                          | 57.8                                                       |

**Table S2.** Biodiversity measures of endophytic (END) and epiphytic (EPI) *Firmicutes* (16S rRNA) found in hypogeous (roots, H) and epigeous organs (leaves and spikes, E) and processed grain of Odisseo (O) and Saragolla (S) durum wheat. Samples are encoded by using the phenological stage (tillering, T; stem elongation, SE; booting, B; flowering, F; milk development, MD; and physiological maturity, PM).

|                | Odisseo | T    | SE   | B    | F    | MD   | PM   | Grain | Flour | Chaff | Bran |
|----------------|---------|------|------|------|------|------|------|-------|-------|-------|------|
| <b>OTU</b>     | END.H   | 218  | 198  | 216  | 171  | 212  | 126  | -     | -     | -     | -    |
|                | EPI.H   | 202  | 83   | 218  | 155  | 153  | 150  | -     | -     | -     | -    |
|                | END.E   | 28   | 23   | 26   | 81   | 47   | 56   | 20    | 130   | -     | -    |
|                | EPI.E   | 36   | 76   | 34   | 64   | 36   | 55   | 81    | -     | 98    | 97   |
| <b>Shannon</b> | END.H   | 3.17 | 3.04 | 2.88 | 2.18 | 2.90 | 0.76 | -     | -     | -     | -    |
|                | EPI.H   | 3.17 | 2.98 | 3.35 | 2.13 | 2.82 | 2.01 | -     | -     | -     | -    |
|                | END.E   | 1.21 | 2.63 | 1.35 | 1.41 | 0.76 | 0.98 | 1.30  | 2.75  | -     | -    |
|                | EPI.E   | 2.14 | 3.09 | 0.38 | 1.87 | 0.78 | 0.67 | 1.80  | -     | 1.16  | 1.14 |
| <b>Simpson</b> | END.H   | 0.91 | 0.89 | 0.85 | 0.64 | 0.87 | 0.27 | -     | -     | -     | -    |
|                | EPI.H   | 0.93 | 0.90 | 0.92 | 0.73 | 0.86 | 0.62 | -     | -     | -     | -    |
|                | END.E   | 0.50 | 0.90 | 0.53 | 0.51 | 0.45 | 0.55 | 0.62  | 0.89  | -     | -    |
|                | EPI.E   | 0.76 | 0.93 | 0.13 | 0.76 | 0.51 | 0.29 | 0.72  | -     | 0.55  | 0.52 |
| <b>ACE</b>     | END.H   | 236  | 226  | 239  | 188  | 237  | 146  | -     | -     | -     | -    |
|                | EPI.H   | 246  | 114  | 243  | 171  | 166  | 182  | -     | -     | -     | -    |
|                | END.E   | 41   | 30   | 38   | 103  | 54   | 85   | 34    | 146   | -     | -    |
|                | EPI.E   | 44   | 97   | 38   | 79   | 39   | 61   | 96    | -     | 120   | 118  |
| <b>Chao</b>    | END.H   | 238  | 235  | 241  | 192  | 238  | 151  | -     | -     | -     | -    |
|                | EPI.H   | 251  | 99   | 235  | 174  | 164  | 183  | -     | -     | -     | -    |
|                | END.E   | 46   | 30   | 71   | 112  | 52   | 108  | 32    | 141   | -     | -    |
|                | EPI.E   | 51   | 97   | 49   | 82   | 38   | 59   | 98    | -     | 119   | 116  |

**Table S2.** (continued)

|                | <b>Saragolla</b> | T    | SE   | B    | F    | MD   | PM   | Grain | Flour | Chaff | Bran |
|----------------|------------------|------|------|------|------|------|------|-------|-------|-------|------|
| <b>OTU</b>     | END.H            | 150  | 202  | 172  | 232  | 187  | 207  | -     | -     | -     | -    |
|                | EPI.H            | 159  | 189  | 218  | 252  | 189  | 125  | -     | -     | -     | -    |
|                | END.E            | 40   | 29   | 45   | 42   | 77   | 68   | 52    | 92    | -     | -    |
|                | EPI.E            | 133  | 69   | 60   | 45   | 51   | 62   | 57    | -     | 127   | 126  |
| <b>Shannon</b> | END.H            | 3.53 | 2.26 | 3.32 | 3.69 | 2.18 | 2.89 | -     | -     | -     | -    |
|                | EPI.H            | 2.30 | 3.05 | 3.27 | 3.58 | 3.51 | 3.16 | -     | -     | -     | -    |
|                | END.E            | 2.52 | 2.27 | 0.31 | 0.33 | 1.45 | 0.94 | 1.30  | 2.75  | -     | -    |
|                | EPI.E            | 2.23 | 2.62 | 1.66 | 1.81 | 1.09 | 0.73 | 1.80  | -     | 1.16  | 1.11 |
| <b>Simpson</b> | END.H            | 0.94 | 0.74 | 0.92 | 0.96 | 0.65 | 0.89 | -     | -     | -     | -    |
|                | EPI.H            | 0.81 | 0.91 | 0.91 | 0.94 | 0.94 | 0.93 | -     | -     | -     | -    |
|                | END.E            | 0.86 | 0.84 | 0.10 | 0.11 | 0.63 | 0.48 | 0.65  | 0.89  | -     | -    |
|                | EPI.E            | 0.80 | 0.87 | 0.69 | 0.75 | 0.44 | 0.43 | 0.72  | -     | 0.55  | 0.50 |
| <b>ACE</b>     | END.H            | 179  | 231  | 211  | 262  | 208  | 242  | -     | -     | -     | -    |
|                | EPI.H            | 174  | 209  | 244  | 273  | 228  | 273  | -     | -     | -     | -    |
|                | END.E            | 57   | 53   | 47   | 47   | 92   | 84   | 70    | 106   | -     | -    |
|                | EPI.E            | 154  | 79   | 78   | 55   | 39   | 79   | 64    | -     | 154   | 152  |
| <b>Chao</b>    | END.H            | 199  | 251  | 228  | 290  | 213  | 248  | -     | -     | -     | -    |
|                | EPI.H            | 175  | 214  | 249  | 270  | 224  | 270  | -     | -     | -     | -    |
|                | END.E            | 56   | 62   | 46   | 46   | 86   | 82   | 64    | 109   | -     | -    |
|                | EPI.E            | 167  | 77   | 75   | 52   | 38   | 74   | 64    | -     | 152   | 149  |

**Table S2.** (continued)

| <b>Commercial durum wheat grain</b> |       | T | SE | B | F | MD | PM | Grain | Flour | Bran |
|-------------------------------------|-------|---|----|---|---|----|----|-------|-------|------|
| <b>OTU</b>                          | END.H | - | -  | - | - | -  | -  | -     | -     | -    |
|                                     | EPI.H | - | -  | - | - | -  | -  | -     | -     | -    |
|                                     | END.E | - | -  | - | - | -  | -  | 45    | 60    | -    |
|                                     | EPI.E | - | -  | - | - | -  | -  | 52    | -     | 54   |
| <b>Shannon</b>                      | END.H | - | -  | - | - | -  | -  | -     | -     | -    |
|                                     | EPI.H | - | -  | - | - | -  | -  | -     | -     | -    |
|                                     | END.E | - | -  | - | - | -  | -  | 0.54  | 0.23  | -    |
|                                     | EPI.E | - | -  | - | - | -  | -  | 0.56  | -     | 0.38 |
| <b>Simpson</b>                      | END.H | - | -  | - | - | -  | -  | -     | -     | -    |
|                                     | EPI.H | - | -  | - | - | -  | -  | -     | -     | -    |
|                                     | END.E | - | -  | - | - | -  | -  | 0.23  | 0.07  | -    |
|                                     | EPI.E | - | -  | - | - | -  | -  | 0.24  | -     | 0.14 |
| <b>ACE</b>                          | END.H | - | -  | - | - | -  | -  | -     | -     | -    |
|                                     | EPI.H | - | -  | - | - | -  | -  | -     | -     | -    |
|                                     | END.E | - | -  | - | - | -  | -  | 50    | 72    | -    |
|                                     | EPI.E | - | -  | - | - | -  | -  | 69    | -     | 60   |
| <b>Chao</b>                         | END.H | - | -  | - | - | -  | -  | -     | -     | -    |
|                                     | EPI.H | - | -  | - | - | -  | -  | -     | -     | -    |
|                                     | END.E | - | -  | - | - | -  | -  | 51    | 75    | -    |
|                                     | EPI.E | - | -  | - | - | -  | -  | 120   | -     | 66   |

OTU, number of Operational Taxonomic Units found in a given sample; Shannon, Shannon diversity index ( $H'$ ) is calculated using:  $H' = - \sum_{i=1}^R p_i \ln(p_i)$ , where  $R$  is richness and  $p_i$  is the relative abundance of the  $i^{\text{th}}$  OTU; Simpson, Simpson diversity index ( $D$ ) is calculated using:  $D = \sum n(n-1)/N(N-1)$ , where  $n$  is the total number of a given OTU and  $N$  is the total number of OTU; ACE, ACE richness estimator; Chao, Chao richness estimator ( $S_{\text{chao1}}$ ) is calculated using:  $S_{\text{chao1}} = S_{\text{obs}} + F_1^2/2F_2$ , where  $S_{\text{obs}}$  is the number of OTU in the sample,  $F_1$  is the number of singletons (i.e., the number of OTU with only a single occurrence in the sample) and  $F_2$  is the number of doubletons (the number of OTU with exactly two occurrences in the sample).

**Table S3.** Relative abundance (%) of endophytic (END) and epiphytic (EPI) lactic acid bacterium genera/species found in hypogeous (roots, H) and epigeous organs (leaves and spikes, E) and grain of Odisseo (O) and Saragolla (S) durum wheat. Species are encoded by: A.v., *Aerococcus viridans*; C. m., *Carnobacterium maltaromaticum*; G. sp., *Granulicatella* sp.; E. f., *Enterococcus faecalis*; E. sp., *Enterococcus* sp.; L. b., *Lactobacillus brevis*; L. f., *Lactobacillus fermentum*; L. g., *Lactobacillus gasseri*; L. i., *Lactobacillus iners*; L. p., *Lactobacillus plantarum*; L. sp., *Lactobacillus*; W. sp., *Weissella* sp.; Lc. g., *Lactococcus garviae*; Lc. l., *Lactococcus lactis*; Lc. sp., *Lactococcus* sp.; S. sp., *Streptococcus* sp.

|                                  | A. v. | C. m. | C. sp. | G. sp. | E. f. | E. sp. | L. b. | L. f. | L. g. | L. i. | L. p. | L. sp. | W. sp. | Lc. g. | Lc. l. | Lc. sp. | S. sp. |
|----------------------------------|-------|-------|--------|--------|-------|--------|-------|-------|-------|-------|-------|--------|--------|--------|--------|---------|--------|
| Tillering END, H, O <sup>a</sup> | 0.006 | 0.004 | 0      | 0      | 0.047 | 0.004  | 0.025 | 0.047 | 0     | 0     | 3.004 | 0.504  | 0.175  | 0      | 0      | 0.052   | 0.919  |
| Tillering EPI, H, O              | 0     | 0.010 | 0      | 0      | 0     | 0      | 0.002 | 0     | 0     | 0     | 8.456 | 0.972  | 0.755  | 0      | 0      | 0.030   | 1.803  |
| Tillering END, E, O              | 0     | 0     | 0      | 0      | 0     | 0.054  | 0     | 0     | 0     | 0     | 6.728 | 0.917  | 0.358  | 0      | 0      | 0.015   | 0.224  |
| Tillering EPI, E, O              | 1.102 | 0     | 0      | 0      | 0.412 | 0      | 0     | 0     | 0     | 0     | 7.407 | 1.631  | 2.160  | 0      | 0      | 0       | 7.745  |
| Tillering END, H, S              | 0     | 0.002 | 0      | 0      | 0     | 0.002  | 0.024 | 0     | 0     | 0.019 | 0.163 | 0.167  | 0.004  | 0      | 0      | 0.049   | 0.056  |
| Tillering EPI, H, S              | 0     | 0     | 0      | 0      | 0     | 0      | 0.005 | 0     | 0     | 0.025 | 0.030 | 0.117  | 0.015  | 0      | 0      | 0.020   | 0.081  |
| Tillering END, E, S              | 0     | 0     | 0      | 0      | 0     | 0      | 0.016 | 0     | 0     | 0     | 0.149 | 0.659  | 0.052  | 0      | 0      | 0.086   | 0.287  |
| Tillering EPI, E, S              | 0     | 0.026 | 0      | 0      | 0.090 | 0.039  | 0     | 0     | 0     | 0     | 0.134 | 0.160  | 0.072  | 0      | 0      | 0.026   | 0.327  |
| Stem elongation END, H, O        | 0     | 0     | 0      | 0.008  | 0.004 | 0      | 0.021 | 0.008 | 0     | 0     | 0.421 | 0.433  | 0.088  | 0      | 0      | 0.017   | 4.508  |
| Stem elongation EPI, H, O        | 0     | 0     | 0      | 0      | 0     | 0      | 0     | 0     | 0     | 0     | 0     | 0.120  | 0      | 0      | 0      | 0.598   | 0.359  |
| Stem elongation END, E, O        | 0     | 0     | 0      | 0      | 0     | 0.002  | 0     | 0     | 0     | 0     | 0.017 | 0.006  | 0.001  | 0      | 0      | 0.001   | 0.018  |
| Stem elongation EPI, E, O        | 0.073 | 0.224 | 0      | 0.713  | 0     | 0.594  | 0     | 0     | 0     | 0.310 | 0.839 | 2.694  | 5.117  | 0      | 0      | 1.585   | 6.662  |
| Stem elongation END, H, S        | 0     | 0.003 | 0      | 0      | 0     | 0      | 0     | 0     | 0     | 0     | 0.063 | 0.073  | 0.013  | 0      | 0      | 0.026   | 0.065  |
| Stem elongation EPI, H, S        | 0     | 0     | 0      | 0      | 0     | 0      | 0     | 0.087 | 0     | 0     | 0     | 0.010  | 0      | 0      | 0      | 0.322   | 0.215  |
| Stem elongation END, E, S        | 0     | 0     | 0      | 0      | 0     | 0.002  | 0     | 0     | 0     | 0.270 | 0.111 | 0.134  | 0.020  | 0      | 0      | 0.034   | 0.116  |
| Stem elongation EPI, E, S        | 0     | 0     | 0      | 0      | 0     | 0      | 0     | 0     | 0     | 0     | 0.124 | 0.825  | 0.154  | 0      | 0      | 0.056   | 0.286  |

|                            |       |       |       |       |       |       |       |       |       |       |        |        |       |   |       |       |        |
|----------------------------|-------|-------|-------|-------|-------|-------|-------|-------|-------|-------|--------|--------|-------|---|-------|-------|--------|
| Booting END, H, O          | 0     | 0.932 | 0     | 0.181 | 0     | 0     | 0     | 7.794 | 0.028 | 0     | 0.018  | 0.192  | 0     | 0 | 0     | 0.007 | 1.156  |
| Booting EPI, H, O          | 0     | 0     | 0.007 | 0.436 | 0     | 0.036 | 0     | 0     | 0     | 0     | 0.029  | 0.524  | 0.044 | 0 | 0.015 | 8.370 | 5.258  |
| Booting END, E, O          | 0     | 0     | 0     | 0.003 | 0     | 0.012 | 0     | 0.009 | 0     | 0     | 0.015  | 0.158  | 0     | 0 | 0     | 0     | 0.533  |
| Booting EPI, E, O          | 0     | 0     | 0     | 0     | 0     | 0     | 0     | 0     | 0     | 0     | 0.026  | 0.154  | 0.030 | 0 | 0     | 0.020 | 0.228  |
| Booting END, H, S          | 0     | 0.005 | 0     | 0.262 | 0     | 0.570 | 0     | 0     | 0     | 0     | 0.103  | 0.005  | 0     | 0 | 0     | 0.087 | 3.180  |
| Booting EPI, H, S          | 0     | 0     | 0     | 0.132 | 0     | 0     | 0     | 0     | 0     | 0     | 0.003  | 0.076  | 0     | 0 | 0     | 0.022 | 1.828  |
| Booting END, E, S          | 0     | 0     | 0     | 0.089 | 0.006 | 0     | 0     | 0     | 0     | 0.027 | 0.037  | 0.019  | 0     | 0 | 0     | 0.037 | 0.704  |
| Booting EPI, E, S          | 0     | 0.004 | 0     | 1.778 | 0     | 0.129 | 0.469 | 0     | 0     | 0     | 1.007  | 5.266  | 0     | 0 | 0     | 0.260 | 54.123 |
| Flowering END, H, O        | 0     | 0.007 | 0     | 0.233 | 0     | 0.048 | 0     | 0     | 0     | 0     | 0.828  | 60.501 | 0     | 0 | 0     | 0.129 | 3.554  |
| Flowering EPI, H, O        | 0     | 0.040 | 0     | 0.015 | 0     | 0     | 1.160 | 0     | 0     | 0     | 29.969 | 24.489 | 0     | 0 | 0     | 0.055 | 1.995  |
| Flowering END, E, O        | 0     | 0.002 | 0     | 0.109 | 0.079 | 0.034 | 0     | 0.005 | 0     | 0     | 1.720  | 55.413 | 0     | 0 | 0     | 0.175 | 10.294 |
| Flowering EPI, E, O        | 0     | 0     | 0     | 0.129 | 0     | 0.058 | 0.143 | 0.138 | 0     | 0     | 0.517  | 1.805  | 0     | 0 | 0     | 0.058 | 19.555 |
| Flowering END, H, S        | 0     | 1.982 | 0.014 | 0.050 | 0.036 | 0     | 0     | 0     | 0     | 0     | 0.163  | 0.262  | 0     | 0 | 0     | 0.045 | 0.643  |
| Flowering EPI, H, S        | 0     | 0     | 0     | 0.050 | 0     | 0.032 | 0     | 0     | 0     | 0     | 0.195  | 0.355  | 0     | 0 | 0     | 0.805 | 5.175  |
| Flowering END, E, S        | 0     | 0.062 | 0     | 0     | 0     | 0.045 | 0     | 0.005 | 0     | 0     | 0.045  | 0.086  | 0     | 0 | 0     | 0.021 | 0.133  |
| Flowering EPI, E, S        | 0     | 0     | 0     | 0     | 0     | 0.002 | 0     | 0     | 0     | 0     | 0.422  | 0.005  | 0     | 0 | 0     | 0.322 | 5.468  |
| Milk development END, H, O | 0     | 0.004 | 0     | 0     | 0     | 0.089 | 0     | 0     | 0     | 0     | 0.122  | 0.030  | 0     | 0 | 0     | 0.070 | 0.093  |
| Milk development EPI, H, O | 0.261 | 0.040 | 0     | 0     | 0     | 0.008 | 0     | 0     | 0     | 0.080 | 0.285  | 0      | 0     | 0 | 0     | 0     | 0.542  |

|                                  |       |       |       |       |       |       |       |       |       |       |        |        |       |       |       |        |        |
|----------------------------------|-------|-------|-------|-------|-------|-------|-------|-------|-------|-------|--------|--------|-------|-------|-------|--------|--------|
| Milk development END, E, O       | 0     | 0     | 0     | 0     | 0     | 1.181 | 0.017 | 0     | 0     | 0     | 0.016  | 0.031  | 0     | 0     | 0     | 0.015  | 0.137  |
| Milk development EPI, E, O       | 0     | 0     | 0     | 0     | 0     | 0.130 | 0     | 0     | 0     | 0     | 0.009  | 0.026  | 0     | 0     | 0     | 0.001  | 0.037  |
| Milk development END, H, S       | 0     | 0     | 0     | 0     | 0     | 0.036 | 0     | 0     | 0     | 0     | 0.077  | 0.004  | 0     | 0     | 0     | 0.105  | 0.093  |
| Milk development EPI, H, S       | 0     | 0.084 | 0     | 0.451 | 0     | 0     | 0     | 0     | 0     | 0     | 0.149  | 0.258  | 0.060 | 0     | 0     | 0      | 1.994  |
| Milk development END, E, S       | 0     | 0.375 | 0     | 0.302 | 0     | 0.041 | 1.832 | 0     | 0     | 0     | 25.558 | 0.214  | 0     | 0     | 0.006 | 1.369  | 2.306  |
| Milk development EPI, E, S       | 0     | 0     | 0     | 0.975 | 0     | 0     | 0     | 0     | 0     | 0     | 0.441  | 0.159  | 0     | 0     | 0     | 0      | 7.269  |
| Physiological maturity END, H, O | 0.008 | 0.009 | 0     | 0.011 | 0     | 0.754 | 0     | 0.006 | 0     | 0     | 0.028  | 0.017  | 0     | 0     | 0.041 | 84.997 | 0.648  |
| Physiological maturity EPI, H, O | 0.160 | 0     | 0     | 0     | 0     | 0     | 0     | 0     | 0     | 0     | 0.456  | 0.453  | 0     | 0     | 0.030 | 60.706 | 2.413  |
| Physiological maturity END, E, O | 0.004 | 0     | 0     | 0     | 0     | 0.002 | 0.002 | 0     | 0     | 0     | 0.011  | 0.007  | 0     | 0     | 0.002 | 46.995 | 0.105  |
| Physiological maturity EPI, E, O | 0     | 0.003 | 0     | 0.009 | 0     | 3.768 | 0     | 0     | 0     | 0     | 0.012  | 0.012  | 0     | 0     | 0     | 1.714  | 0.168  |
| Physiological maturity END, H, S | 0     | 0.007 | 0     | 0.025 | 0.014 | 0.098 | 0.018 | 0     | 0     | 0     | 0.007  | 0.049  | 0     | 0     | 0     | 0.049  | 0.119  |
| Physiological maturity EPI, H, S | 0     | 0     | 0     | 0     | 0     | 0     | 0     | 0     | 0     | 0     | 0.460  | 10.587 | 0     | 0     | 0     | 0.097  | 0.453  |
| Physiological maturity END, E, S | 0     | 1.305 | 0.021 | 0     | 0     | 0.003 | 0.009 | 0     | 0     | 0     | 0.026  | 0.009  | 0     | 0     | 0     | 0.017  | 0.037  |
| Physiological maturity EPI, E, S | 0     | 0.004 | 0     | 0.002 | 0     | 0.015 | 0.002 | 0     | 0     | 0.008 | 0.006  | 0.043  | 0     | 0     | 0     | 0.008  | 0.053  |
| Grain END, O                     | 0     | 0     | 0     | 0     | 0     | 0.008 | 0     | 0     | 0     | 0     | 0      | 0.199  | 0     | 0     | 0     | 0.008  | 0      |
| Grain EPI, O                     | 0     | 0     | 0.007 | 0     | 0     | 1.275 | 0     | 0     | 0.022 | 0     | 0.048  | 0.067  | 0.007 | 0     | 0     | 0.163  | 0.641  |
| Flour O                          | 0.004 | 0.328 | 0     | 1.204 | 0.001 | 0.514 | 0.084 | 0     | 0     | 0.017 | 0.187  | 8.346  | 0     | 0.070 | 0.090 | 19.141 | 20.352 |
| Bran O                           | 0.003 | 0.321 | 0     | 1.202 | 0.003 | 0.520 | 0.081 | 0     | 0     | 0.015 | 0.180  | 8.220  | 0     | 0.065 | 0.086 | 19.132 | 20.111 |

---

|                    |   |       |       |       |       |        |       |       |   |   |       |       |       |       |       |        |       |
|--------------------|---|-------|-------|-------|-------|--------|-------|-------|---|---|-------|-------|-------|-------|-------|--------|-------|
| Chaff O            | 0 | 0.169 | 0.005 | 0.007 | 0     | 2.419  | 0.005 | 0     | 0 | 0 | 0.055 | 0.023 | 0     | 0     | 0     | 0.030  | 0.039 |
| Grain END, S       | 0 | 0.004 | 0     | 0.012 | 0     | 22.296 | 0     | 0     | 0 | 0 | 0.023 | 0.012 | 0     | 0     | 0     | 0      | 0.070 |
| Grain EPI, S       | 0 | 0     | 0     | 0.014 | 0     | 12.523 | 0     | 0     | 0 | 0 | 0.007 | 0.082 | 0     | 0     | 0     | 0.011  | 0.039 |
| Flour S            | 0 | 0.291 | 0.002 | 0.161 | 0     | 8.207  | 0     | 0.019 | 0 | 0 | 0.469 | 0.230 | 0.008 | 0     | 0     | 0.372  | 1.302 |
| Bran S             | 0 | 0.258 | 0.001 | 0.153 | 0     | 8.307  | 0     | 0.013 | 0 | 0 | 0.502 | 0.224 | 0.006 | 0     | 0     | 0.371  | 1.283 |
| Chaff S            | 0 | 6.170 | 0.039 | 0.021 | 0.239 | 3.188  | 0.025 | 0     | 0 | 0 | 0.080 | 0.011 | 4.636 | 0.062 | 0     | 0.003  | 0.109 |
| Control grain, END | 0 | 0     | 0     | 0     | 0     | 0.148  | 0.014 | 0     | 0 | 0 | 0.012 | 0.033 | 0     | 0     | 0     | 70.452 | 0.093 |
| Control grain, EPI | 0 | 0     | 0     | 0     | 0     | 0.006  | 0.024 | 0     | 0 | 0 | 0.014 | 0.026 | 0     | 0     | 0.002 | 74.234 | 0.104 |
| Control flour      | 0 | 0     | 0     | 0     | 0     | 0.195  | 0     | 0     | 0 | 0 | 0.014 | 0.008 | 0     | 0.061 | 0.006 | 89.021 | 0.161 |
| Control bran       | 0 | 0     | 0     | 0     | 0     | 0.0789 | 0.009 | 0     | 0 | 0 | 0.033 | 0.254 | 0.007 | 0.007 | 0.002 | 85.124 | 0.289 |

---





**Figure S2.** Cross sections of roots (panels A, C, and E) and leaves (panels B, D, and F) of durum wheat (Odisseo) sampled at the stem elongation stage, showing bacterial cells (indicated by arrows). Panels A and B show non-fluorescent sections of durum wheat organs. Metabolically active and dead/damaged bacterial cells are stained green (panels C and D) and red (panels E and F), respectively. Spacebar is 500  $\mu\text{m}$ .

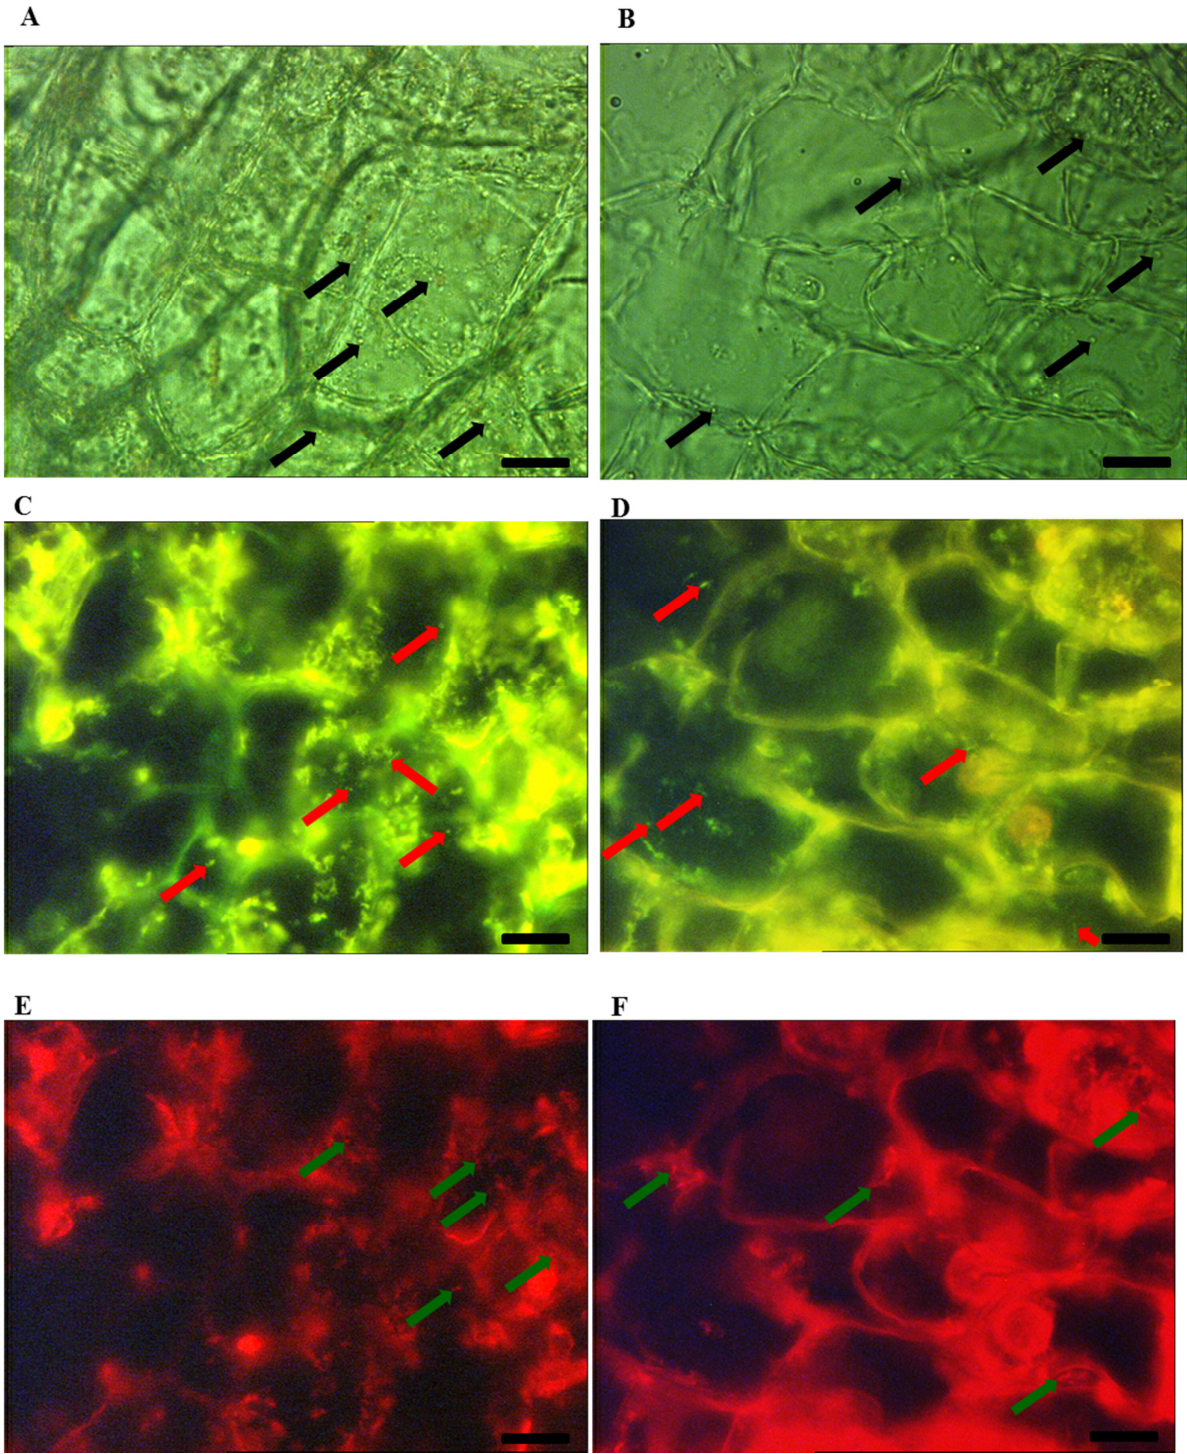



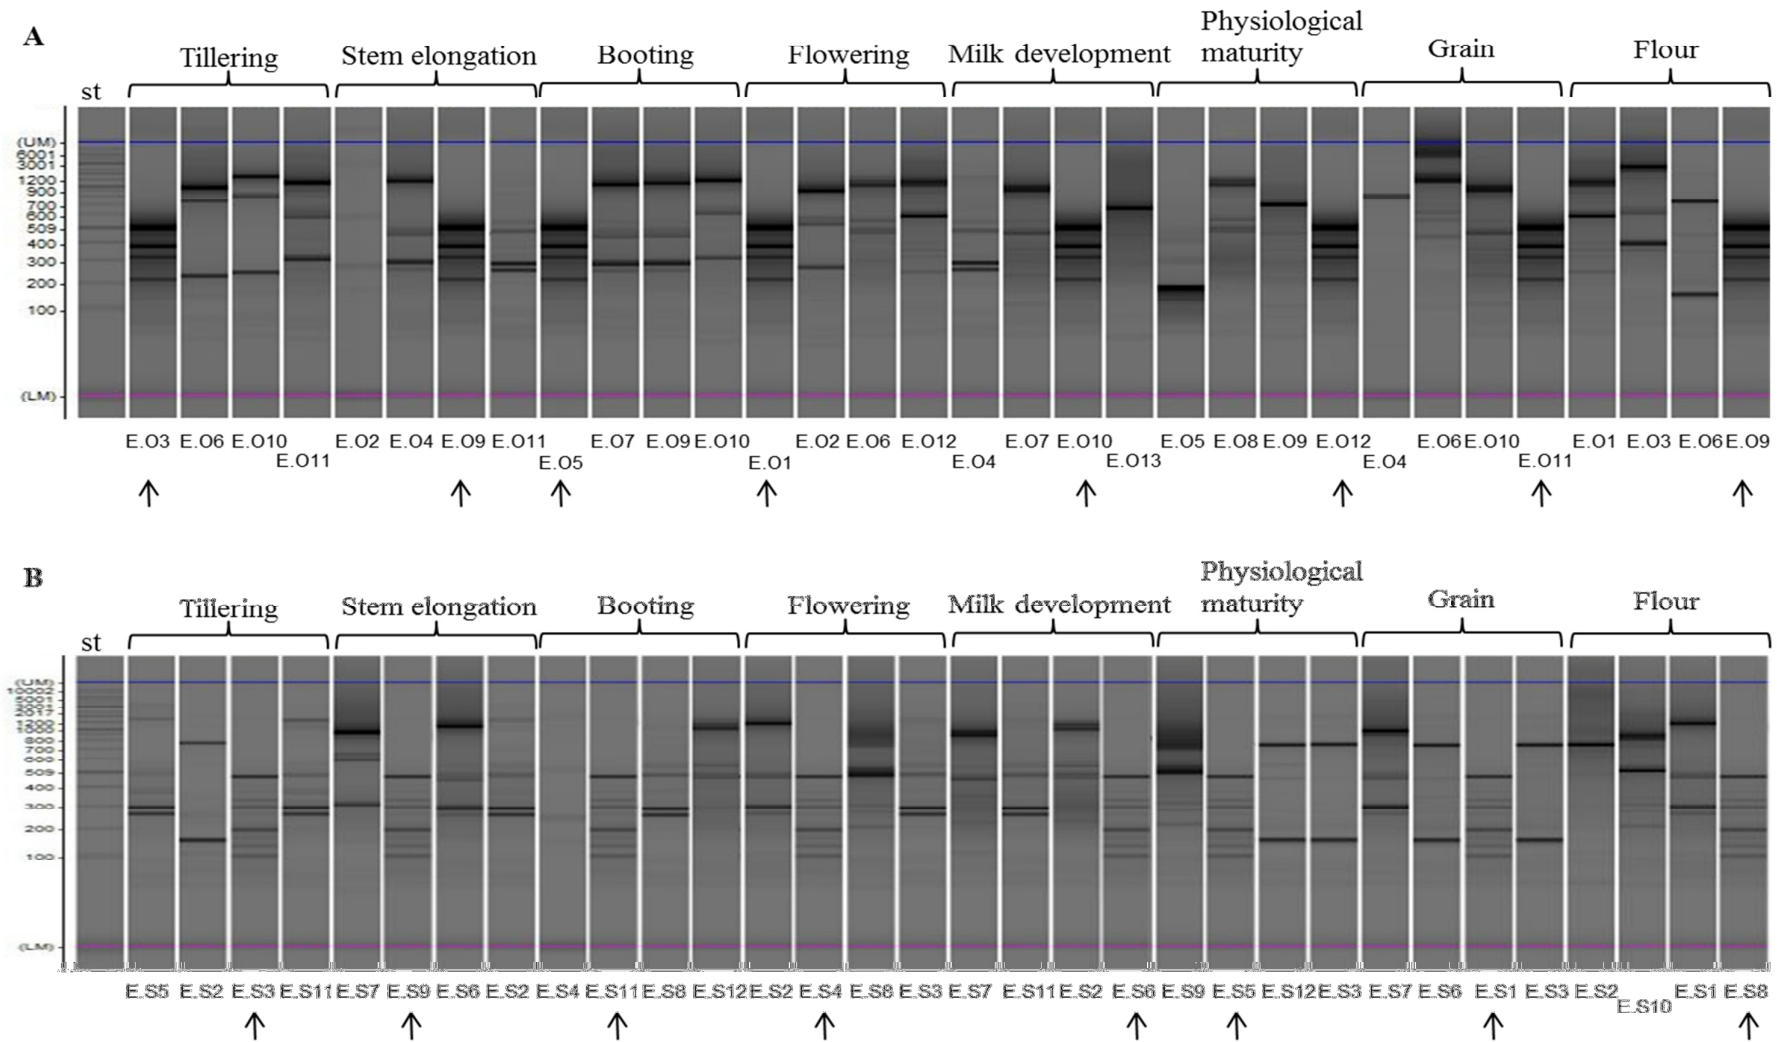

**FIG S3** Representative Randomly Amplified Polymorphic DNA-PCR (RAPD-PCR) profiles of *Lactobacillus plantarum* isolated from leaves/spikes, grain, or flour of Odiseo (A) and Saragolla (B) durum wheat. Primer P7 was used for RAPD-PCR analysis. 2-Log DNA Ladder (0.1-10.0 kb) was used as molecular size standard (st). Capillary electrophoretic profiles were singly acquired by MultiNA. Strains isolated from different phenological stages and processed wheat, and showing similar RAPD-PCR profiles are indicated by arrows.

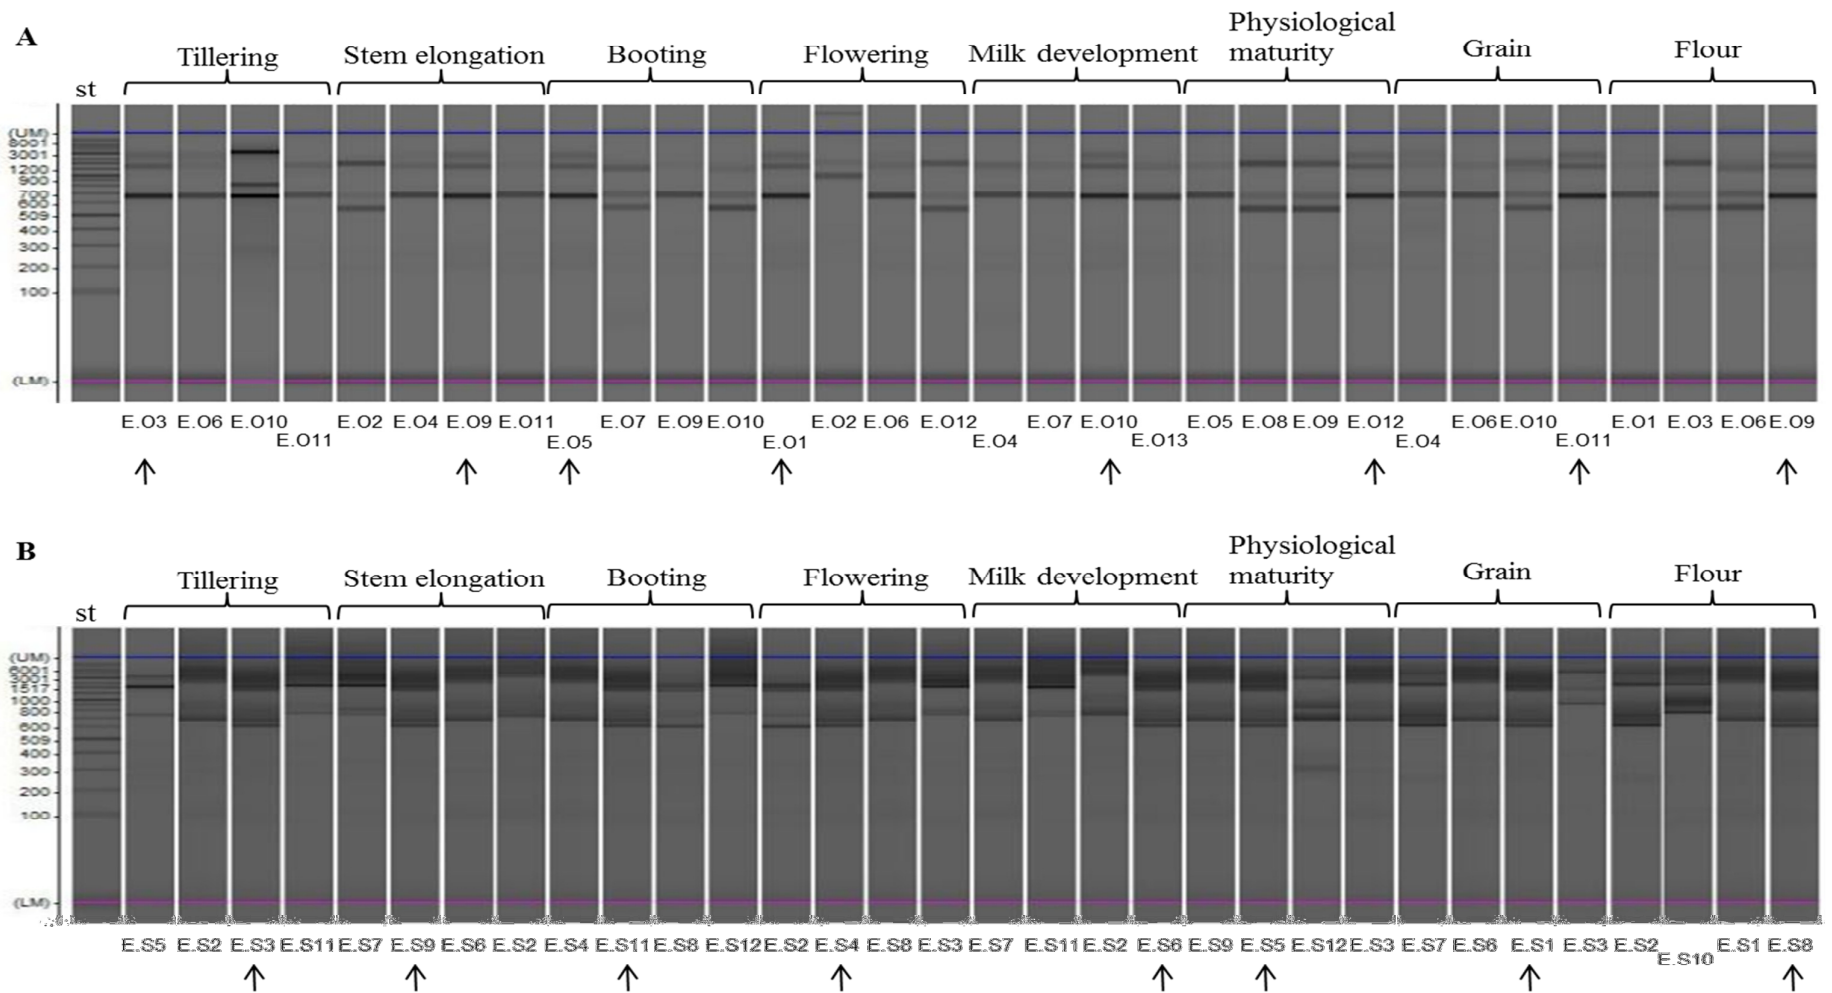

**FIG S4** Representative Randomly Amplified Polymorphic DNA-PCR (RAPD-PCR) profiles of *Lactobacillus plantarum* isolated from leaves/spikes, grain, or flour of Odisseo (A) and Saragolla (B) durum wheat. Primer P4 was used for RAPD-PCR analysis. 2-Log DNA Ladder (0.1-10.0 kb) was used as molecular size standard (st). Capillary electrophoretic profiles were singly acquired by MultiNA. Strains isolated from different phenological stages and processed wheat, and showing similar RAPD-PCR profiles are indicated by arrows.

**Figure S5.** Score plot of the two principal components (PC) after principal component analysis (PCA) of environmental temperature, water activity of the wheat organs, cell density of presumptive lactic acid bacteria on selective media, and lactic acid bacterium OTU (genus level) found on hypogeous organs (roots), epigeous organs (leaves and spikes) and processed wheat (grain, chaff, bran and flour) of Odiseo and Saragolla. Hypogeous and epigeous organs were analyzed at tillering, stem elongation, booting, flowering, milk development and physiological maturity stages.

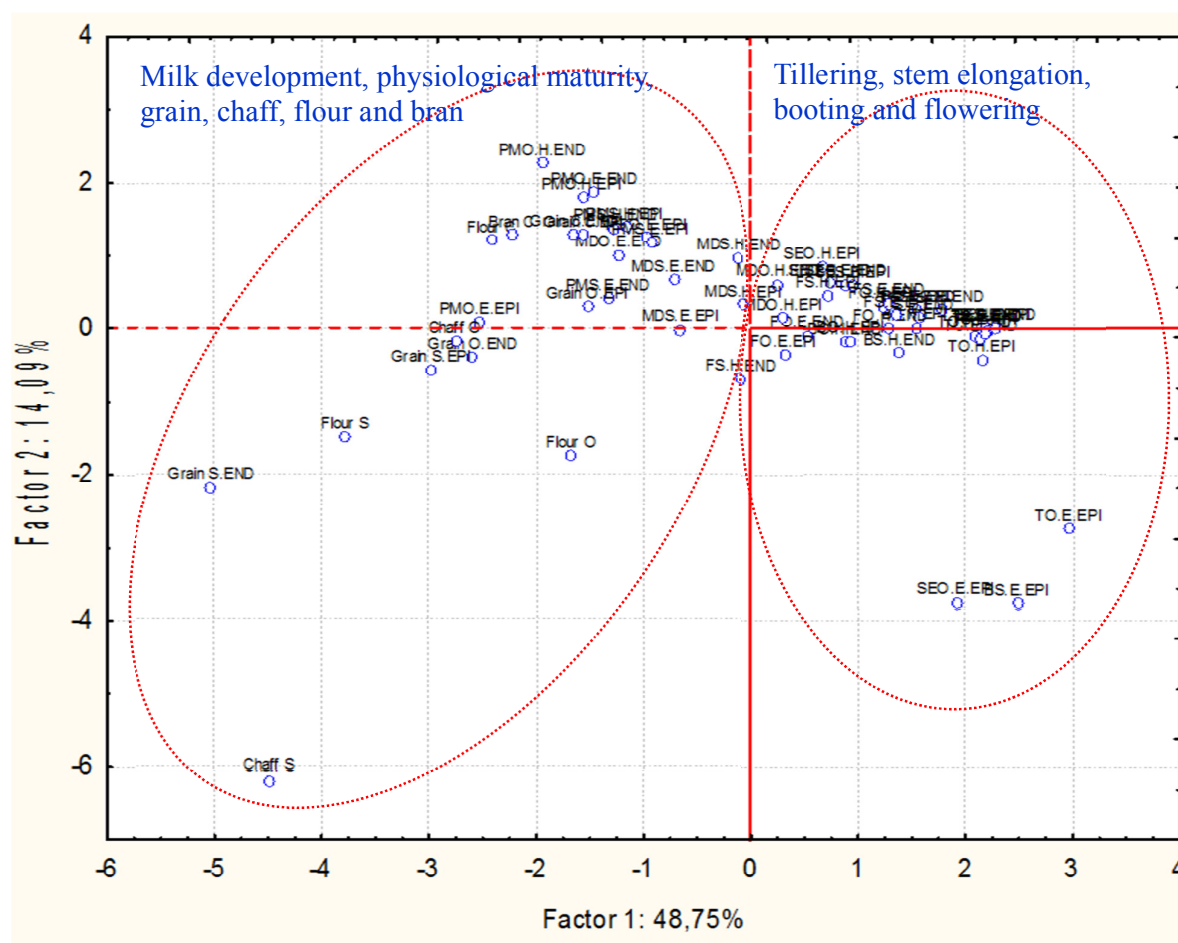

Supplement: AEM.01852-15_zam999116605so1.pdf [file AEM.01852-15_zam999116605so1.pdf]
